# Supplementary material for: Are Anti-rhGAA Antibodies a Determinant of Treatment Outcome in Adults with Late-Onset Pompe Disease? A Systematic Review
Source: MDPI journal article supplement (doi:10.3390/biom13091414), 2023-09-19
Supplement: s1 [file s1]

| Author (year)<br>[Ref. #]          | Patient<br>no. | Sex | Age                       | Allele 1, protein<br>change                   | Allele 2, protein<br>change                            | Age at<br>onset | Age at<br>diagnosis | Age at start<br>treatment | Dosing                                   | Treatment<br>duration                  | Highest antibody<br>titer (neutralising<br>effect) | Definition high antibody titer<br>and high sustained antibody<br>titer (HSAT) | IARs | Treatment response                                                                                                                                     |
|------------------------------------|----------------|-----|---------------------------|-----------------------------------------------|--------------------------------------------------------|-----------------|---------------------|---------------------------|------------------------------------------|----------------------------------------|----------------------------------------------------|-------------------------------------------------------------------------------|------|--------------------------------------------------------------------------------------------------------------------------------------------------------|
| De Vries, J.M.<br>[2010] [29]      | 2              | M   | NR                        | c.-32-13T>G,<br>p.[=,0]*                      | c.925G>A *<br>p.Gly309Arg                              | 46              | 52                  | 54                        | 20mg/kg/eow                              | NR                                     | 0 (NR)                                             | Not defined                                                                   | None | Good response                                                                                                                                          |
| De Vries, J.M.<br>[2010] [29]      | 3              | F   | NR                        | c.-32-13T>G<br>p.[=,0]*                       | Not in Pompe variant<br>database<br>p.Glu176fs         | 36              | 62                  | 63                        | 20mg/kg/eow                              | NR                                     | 0 (NR)                                             |                                                                               | None | Good response                                                                                                                                          |
| De Vries, J.M.<br>[2010] [29]      | 4              | F   | NR                        | c.-32-13T>G<br>p.[=,0]*                       | Not in Pompe variant<br>database<br>p.Cys127fs         | 44              | 51                  | 54                        | 20mg/kg/eow                              | NR                                     | 0 (NR)                                             |                                                                               | None | Good response                                                                                                                                          |
| Lipinski, S.E.<br>[2009] [33]      | 1              | F   | NR                        | NR                                            | NR                                                     | NR              | 28                  | NR                        | 10mg/kg/w,<br>20mg/kg/eow, 10<br>mg/kg/w | 13 weeks,<br>interpretation of<br>data | 1:1,600 (NR)                                       | Not defined                                                                   | 7    | NR                                                                                                                                                     |
| Lin, D.S.<br>[2013] [36]           | 1              | F   | 37                        | NR                                            | NR                                                     | NR              | 26                  | 33                        | 20mg/kg/eow, 20 mg/kg<br>every 4 weeks   | 4 years                                | NR*                                                | Not defined                                                                   | NR   | Good, pulmonary and motor function remained stable, respiratory function and endurance responded well during year one and maintained stable afterwards |
| Schneider, I.<br>[2014] [37]       | 1              | M   | 52 (start<br>observation) | c.-32-13T>G<br>p.[=,0]*                       | c.307T>G *<br>p.C103G                                  | NR              | NR                  | 48 **                     | 20mg/kg/eow***                           | 4 years in study                       | 0 (NR)                                             | > 1: 51,200 on two or more<br>occasions at or beyond 6 months<br>on ERT       | NR   | Stable disease course under ERT                                                                                                                        |
| Schneider, I.<br>[2014] [37]       | 2              | M   | 44 (start<br>observation) | c.-32-13T>G<br>p.[=,0]*                       | c.1495T>A *<br>p.W499R                                 | NR              | NR                  | 40 **                     | 20mg/kg/eow***                           | 4 years in study                       | 1:25,600 (NR)                                      |                                                                               | NR   | Antibody titer of 1:25,600 had no impact on the functional status                                                                                      |
| Schneider, I.<br>[2014] [37]       | 3              | F   | 69 (start<br>observation) | c.-32-13T>G<br>p.[=,0]*                       | c.2481+102_2646+31<br>del<br>p.(Gly828_Asn882del)<br>* | NR              | NR                  | 66 **                     | 20mg/kg/eow***                           | 4 years in study                       | 1:3,200 (NR)                                       |                                                                               | NR   | Stable disease course under ERT                                                                                                                        |
| Schneider, I.<br>[2014] [37]       | 4              | M   | 43 (start<br>observation) | c.-32-13T>G<br>p.[=,0]*                       | c.2136_2137del<br>p.(Phe713Profs*23) *                 | NR              | NR                  | 41 **                     | 20mg/kg/eow***                           | 4 years in study                       | 1:6,400 (NR)                                       |                                                                               | NR   | Stable disease course under ERT                                                                                                                        |
| Schneider, I.<br>[2014] [37]       | 5              | F   | 36 (start<br>observation) | c.1478C>T *<br>p.P493L                        | c.1655T>C *<br>p.L552P                                 | NR              | NR                  | 34 **                     | 20mg/kg/eow***                           | 4 years in study                       | 1:3,200 (NR)                                       |                                                                               | NR   | Stable disease course under ERT                                                                                                                        |
| Schneider, I.<br>[2014] [37]       | 6              | F   | 47 (start<br>observation) | c.-32-13T>G<br>p.[=,0]*                       | c.1655T>C *<br>p.L552P                                 | NR              | NR                  | 45 **                     | 20mg/kg/eow***                           | 4 years in study                       | 1:25,600 (NR)                                      |                                                                               | NR   | Decline at 40 months of ERT, need for non-invasive ventilation and walking aids                                                                        |
| Schneider, I.<br>[2014] [37]       | 7              | M   | 63 (start<br>observation) | c.-32-13T>G<br>p.[=,0]*                       | c.925G>A *<br>p.G309R                                  | NR              | NR                  | 63 **                     | 20mg/kg/eow***                           | 4 years in study                       | 1:400 (NR)                                         |                                                                               | NR   | Stable disease course under ERT                                                                                                                        |
| Schneider, I.<br>[2014] [37]       | 8              | F   | 19 (start<br>observation) | c.-32-13T>G<br>p.[=,0]*                       | c.1438-1G>C<br>p.? *                                   | NR              | NR                  | 19 **                     | 20mg/kg/eow***                           | 4 years in study                       | 1:200 (NR)                                         |                                                                               | NR   | Stable disease course under ERT                                                                                                                        |
| Schneider, I.<br>[2014] [37]       | 9              | F   | 56 (start<br>observation) | c.307T>G *<br>p.C103G                         | c.1478C>T *<br>p.P493L                                 | NR              | NR                  | 56 **                     | 20mg/kg/eow***                           | 4 years in study                       | <100 (NR)                                          |                                                                               | NR   | Stable disease course under ERT                                                                                                                        |
| Schneider, I.<br>[2014] [37]       | 10             | M   | 47 (start<br>observation) | c.307T>G *<br>p.C103G                         | c.1478C>T *<br>p.P493L                                 | NR              | NR                  | 47 **                     | 20mg/kg/eow***                           | 4 years in study                       | 1:1,600 (NR)                                       |                                                                               | NR   | Stable disease course under ERT                                                                                                                        |
| Gallay, L.<br>[2016] [39]          | 1              | F   | NR                        | c.1_15T>G<br>Not in Pompe variant<br>database | c.1636+1G>C<br>p.? *                                   | 42              | 44                  | 44                        | 20mg/kg/eow                              | 3 years                                | 0## (NR)                                           | Not defined                                                                   | ≥ 1  | Significant efficiency regarding recent improvement of clinical test and respiratory investigations                                                    |
| Fernandez-Simon, E.<br>[2019] [43] | 1              | F   | 50                        | c.-32-13T>G<br>p.[=,0]*                       | c.1076-1G>C<br>p.? *                                   | NR              | NR                  | 47 **                     | 20mg/kg/eow                              | NR                                     | 1:800 (NR)                                         | >1:31,200, sustained not defined                                              | NR   | NR                                                                                                                                                     |
| Fernandez-Simon, E.<br>[2019] [43] | 2              | F   | 48                        | c.-32-13T>G<br>p.[=,0]*                       | c.2173C>T<br>p.(Arg725Trp) *                           | NR              | NR                  | 39 **                     | 20mg/kg/eow                              | NR                                     | 1:1,600 (NR)                                       |                                                                               | NR   | NR                                                                                                                                                     |
| Fernandez-Simon (2019)<br>[43]     | 3              | F   | 63                        | c.-32-13T>G<br>p.[=,0]*                       | c.2600_2604delinsA<br>p.(Val867Glu fs*19) *            | NR              | NR                  | 59 **                     | 20mg/kg/eow                              | NR                                     | 0 (NR)                                             |                                                                               | NR   | NR                                                                                                                                                     |
| Fernandez-Simon, E.<br>[2019] [43] | 4              | F   | 45                        | c.-32-13T>G<br>p.[=,0]*                       | c.1532C>A<br>Not in Pompe variant<br>database          | NR              | NR                  | 42 **                     | 20mg/kg/eow                              | NR                                     | 1:3,200 (NR)                                       |                                                                               | NR   | NR                                                                                                                                                     |
| Fernandez-Simon, E.<br>[2019] [43] | 5              | F   | 51                        | c.-32-13T>G<br>p.[=,0]*                       | c.236_246del<br>p.(Pro79Arg fs*13) *                   | NR              | NR                  | 47 **                     | 20mg/kg/eow                              | NR                                     | 1:1,600 (NR)                                       |                                                                               | NR   | NR                                                                                                                                                     |

|                                 |    |   |    |                           |                                                     |    |    |       |             |    |               |  |    |    |
|---------------------------------|----|---|----|---------------------------|-----------------------------------------------------|----|----|-------|-------------|----|---------------|--|----|----|
| Fernandez-Simon, E. (2019) [43] | 6  | M | 66 | c.-32-13T>G p.[=,0]*      | c. 1933G>T p.(Asp645Tyr) *                          | NR | NR | 66 ** | 20mg/kg/eow | NR | 0 (NR)        |  | NR | NR |
| Fernandez-Simon, E. (2019) [43] | 7  | F | 59 | c.-32-13T>G p.[=,0]*      | c.1637G>A Not in Pompe variant database             | NR | NR | 52 ** | 20mg/kg/eow | NR | 1:1,600 (NR)  |  | NR | NR |
| Fernandez-Simon, E. (2019) [43] | 8  | F | 55 | c.-32-13T>G p.[=,0]*      | c.2173C>T p.(Arg725Trp) *                           | NR | NR | 48 ** | 20mg/kg/eow | NR | 0 (NR)        |  | NR | NR |
| Fernandez-Simon (2019) [43]     | 9  | M | 42 | c.-32-13T>G p.[=,0]*      | c.573C>A p.(Tyr191*) *                              | NR | NR | 39 ** | 20mg/kg/eow | NR | 1:6,400 (NR)  |  | NR | NR |
| Fernandez-Simon, E. (2019) [43] | 10 | F | 31 | c.-32-13T>G p.[=,0]*      | c.1637G>A Not in Pompe variant database             | NR | NR | 26 ** | 20mg/kg/eow | NR | 1:3,200 (NR)  |  | NR | NR |
| Fernandez-Simon, E. (2019) [43] | 11 | F | 39 | c.-32-13T>G p.[=,0]*      | c. 1655T>C p.(Leu552Pro) *                          | NR | NR | 32 ** | 20mg/kg/eow | NR | 1:3,200 (NR)  |  | NR | NR |
| Fernandez-Simon, E. (2019) [43] | 12 | M | 47 | c.2173C>T p.(Arg725Trp) * | c.2173C>T p.(Arg725Trp) *                           | NR | NR | 45 ** | 20mg/kg/eow | NR | 1:6,400 (NR)  |  | NR | NR |
| Fernandez-Simon, E. (2019) [43] | 13 | M | 51 | c.-32-13T>G p.[=,0]*      | c.1657C>T p.(Gln553*) *                             | NR | NR | 45 ** | 20mg/kg/eow | NR | 1:1,600 (NR)  |  | NR | NR |
| Fernandez-Simon, E. (2019) [43] | 14 | F | 51 | c.-32-13T>G p.[=,0]*      | c.1657C>T p.(Gln553*) *                             | NR | NR | 46 ** | 20mg/kg/eow | NR | 0 (NR)        |  | NR | NR |
| Fernandez-Simon, E. (2019) [43] | 16 | F | 35 | c.-32-13T>G p.[=,0]*      | c.1A>T p.(0) *                                      | NR | NR | 29 ** | 20mg/kg/eow | NR | 1:3,200 (NR)  |  | NR | NR |
| Fernandez-Simon, E. (2019) [43] | 17 | F | 40 | c.-32-13T>G p.[=,0]*      | c.1889-1G>A Not in Pompe variant database           | NR | NR | 39 ** | 20mg/kg/eow | NR | 0 (NR)        |  | NR | NR |
| Fernandez-Simon, E. (2019) [43] | 18 | F | 52 | c.1781G>A p.(Arg594His) * | c.1194+5G>A p.? *                                   | NR | NR | 45 ** | 20mg/kg/eow | NR | 1:1,600 (NR)  |  | NR | NR |
| Fernandez-Simon, E. (2019) [43] | 19 | M | 64 | c.-32-13T>G p.[=,0]*      | c.2481+102_2646+31 del p.(Gly828_Asn882del) *       | NR | NR | 62 ** | 20mg/kg/eow | NR | 0 (NR)        |  | NR | NR |
| Fernandez-Simon, E. (2019) [43] | 20 | F | 57 | c.-32-13T>G p.[=,0]*      | c. 1447G>T p.(Gly483Trp) *                          | NR | NR | 54 ** | 20mg/kg/eow | NR | 1:12,800 (NR) |  | NR | NR |
| Fernandez-Simon, E. (2019) [43] | 21 | M | 46 | c.-32-13T>G p.[=,0]*      | c. 1532C>A Not in Pompe variant database            | NR | NR | 45 ** | 20mg/kg/eow | NR | 1:6,400 (NR)  |  | NR | NR |
| Fernandez-Simon, E. (2019) [43] | 22 | M | 51 | c.-32-13T>G p.[=,0]*      | c. 1933G>T p.(Asp645Tyr) *                          | NR | NR | 50 ** | 20mg/kg/eow | NR | 1:1,600 (NR)  |  | NR | NR |
| Fernandez-Simon, E. (2019) [43] | 23 | M | 43 | c.-32-13T>G p.[=,0]*      | c. 1408_1410delinsTTT Not in Pompe variant database | NR | NR | 42 ** | 20mg/kg/eow | NR | 1:1,600 (NR)  |  | NR | NR |
| Fernandez-Simon, E. (2019) [43] | 24 | F | 51 | c.-32-13T>G p.[=,0]*      | c.-32-13T>G p.[=,0] *                               | NR | NR | 45 ** | 20mg/kg/eow | NR | 1:1,600 (NR)  |  | NR | NR |
| Fernandez-Simon, E. (2019) [43] | 25 | M | 42 | c.-32-13T>G p.[=,0]*      | c. 655G>A p.(Gly219Arg) *                           | NR | NR | 42 ** | 20mg/kg/eow | NR | 0 (NR)        |  | NR | NR |

|                           |    |    |    |                          |                                          |     |    |    |                |            |                   |                                  |      |                                                                                                                                                   |
|---------------------------|----|----|----|--------------------------|------------------------------------------|-----|----|----|----------------|------------|-------------------|----------------------------------|------|---------------------------------------------------------------------------------------------------------------------------------------------------|
| Alandy-Dy, J. (2019) [44] | 2  | M  | 48 | c.1935C>A p.(Asp645Glu)* | c.1594G>A p.(Gly532Ser)*                 | 39  | 43 | 44 | 20mg/kg/eow*** | 4 years**  | NR                | Not defined                      | None | NR                                                                                                                                                |
| Alandy-Dy, J. (2019) [44] | 3  | M  | 56 | c.-32-13T>G p.[=,0]*     | c.2431delC p.(Leu811Trpfs*37)*           | 30s | 48 | 48 | 20mg/kg/eow*** | 8 years**  | NR                |                                  | None | NR                                                                                                                                                |
| Alandy-Dy, J. (2019) [44] | 6  | F  | 57 | c.-32-13T>G p.[=,0]*     | c.925G>A p.(Gly309Arg)*                  | 20s | 31 | 46 | 20mg/kg/eow*** | 11 years** | NR                |                                  | None | NR                                                                                                                                                |
| Alandy-Dy, J. (2019) [44] | 7  | M  | 50 | c.-32-13T>G p.[=,0]*     | c.925G>A p.(Gly309Arg)*                  | 32  | 38 | 43 | 20mg/kg/eow*** | 7 years**  | NR                |                                  | None | NR                                                                                                                                                |
| Alandy-Dy, J. (2019) [44] | 8  | F  | 49 | c.-32-13T>G p.[=,0]*     | c.1437+2T>C p.(Asp443_Lys479del)*        | 20s | 42 | 42 | 20mg/kg/eow*** | 7 years**  | NR                |                                  | None | NR                                                                                                                                                |
| Alandy-Dy, J. (2019) [44] | 11 | M  | 68 | c.-32-13T>G p.[=,0]*     | c.1951-1952delGGinsT p.(Gly651Serfs*45)* | 30s | 55 | 61 | 20mg/kg/eow*** | 7 years**  | NR                |                                  | None | NR                                                                                                                                                |
| Alandy-Dy, J. (2019) [44] | 12 | M  | 63 | c.-32-13T>G p.[=,0]*     | c.1951-1952delGGinsT p.(Gly651Serfs*45)* | 35  | 55 | 56 | 20mg/kg/eow*** | 7 years**  | NR                |                                  | None | NR                                                                                                                                                |
| Alandy-Dy, J. (2019) [44] | 13 | M  | 50 | c.-32-13T>G p.[=,0]*     | c.525_526delTG p.(Asn177Profs*11)*       | 42  | 45 | 45 | 20mg/kg/eow*** | 5 years**  | NR                |                                  | None | NR                                                                                                                                                |
| Alandy-Dy, J. (2019) [44] | 14 | M  | 63 | c.-32-13T>G p.[=,0]*     | c.1445C>G p.(Pro482Arg)*                 | 47  | 58 | 58 | 20mg/kg/eow*** | 5 years**  | NR                |                                  | None | NR                                                                                                                                                |
| Alandy-Dy, J. (2019) [44] | 16 | M  | 64 | c.-32-13T>G p.[=,0]*     | c.307T>G p.(Cys103Gly)*                  | 56  | 60 | 61 | 20mg/kg/eow*** | 3 years**  | NR                |                                  | None | NR                                                                                                                                                |
| Alandy-Dy, J. (2019) [44] | 18 | M  | 65 | c.-32-13T>G p.[=,0]*     | c.1051delG p.(Val351Cysfs*41)*           | 40  | 62 | 62 | 20mg/kg/eow*** | 3 years**  | NR                |                                  | None | NR                                                                                                                                                |
| Winkler, M. (2022) [45]   | 1  | NR | NR | c.-32-13T>G p.[=,0]*     | NR                                       | NR  | NR | NR | 20mg/kg/eow    | NR         | 1:3,200 (NR)****  | ≥1:31,250, sustained not defined | None | MRC stabilization followed by decline, QMFT decline, 6MWT decline followed by improvement, FVC sitting and supine decline                         |
| Winkler, M. (2022) [45]   | 2  | NR | NR | c.-32-13T>G p.[=,0]*     | NR                                       | NR  | NR | NR | 20mg/kg/eow    | NR         | 0 (NR)            |                                  | None | MRC stabilization, QMFT decline, 6MWT decline, FVC sitting improvement followed by decline, FVC supine stabilization                              |
| Winkler, M. (2022) [45]   | 3  | NR | NR | c.-32-13T>G p.[=,0]*     | NR                                       | NR  | NR | NR | 20mg/kg/eow    | NR         | 1:800 (NR)****    |                                  | None | MRC improvement followed by decline, QMFT decline, 6MWT improvement followed by decline, FVC sitting and supine stabilization followed by decline |
| Winkler, M. (2022) [45]   | 4  | NR | NR | c.-32-13T>G p.[=,0]*     | NR                                       | NR  | NR | NR | 20mg/kg/eow    | NR         | 1:25,600 (NR)**** |                                  | None | MRC decline followed by stabilization, QMFT decline, 6MWT improvement, FVC sitting and supine decline                                             |
| Winkler, M. (2022) [45]   | 5  | NR | NR | c.-32-13T>G p.[=,0]*     | NR                                       | NR  | NR | NR | 20mg/kg/eow    | NR         | 1:1,600 (NR)****  |                                  | None | MRC stabilization, QMFT stabilization followed by decline, 6MWT decline, FVC sitting and supine decline                                           |

**Supplementary Table S1: Data on a patient level in patients with a low to intermediate(as defined by the studies) maximum titer. High Sustained Antibody Titer (HSAT), Infusion Associated Reactions (IARs), milligram per kilogram every other week (mg/kg/eow), F (F), Male (M), Enzyme Replacement Therapy (ERT), milligram per kilogram every other week (mg/kg/eow), Not reported (NR), Enzyme Replacement Therapy (ERT), recombinant human alpha-Glucosidase (rhGAA), Medical Research Council (MRC) sum score, quick motor function test (QMFT), 6 Minute walking test (6MWT), Forced Vital Capacity (FVC). \*Interpretation based on Pompe variant database, it should be noted that in case of determination of the mutation based on the protein change is not 100% accurate. \*\*Calculated from paper data. \*\*\* If dosage is not mentioned we assumed the standard EMA/FDA approved dosage was used. \*\*\*\* No absolute data presented, read from study figures. #Anti-rhGAA IgG antibody titer was NR in this study, this study was included because it reports on alternative dosing. ##IgE antibody titer.**
