# Supplementary material for: Are Anti-rhGAA Antibodies a Determinant of Treatment Outcome in Adults with Late-Onset Pompe Disease? A Systematic Review
Source: MDPI journal article supplement (doi:10.3390/biom13091414), 2023-09-19
Supplement: s1 [file s1]

## Supplementary File S1

### Initial literature search (12-03-2019)

| Database                        | # of refs   | After de-duplication |
|---------------------------------|-------------|----------------------|
| Embase.com                      | 1441        | 1375                 |
| Medline Ovid                    | 697         | 70                   |
| Web of Science                  | 1136        | 377                  |
| PsycInfo Ovid                   | 65          | 7                    |
| Cochrane (Clinical Trials only) | 45          | 11                   |
| Google Scholar (random top-200) | 139         | 43                   |
| <b>Total</b>                    | <b>3523</b> | <b>1883</b>          |

#### Embase – 1441 refs

('glycogen storage disease type 2'/exp OR (pompe\* OR ((glycogen\*) NEAR/3 (storage\*) NEAR/3 (2 OR ii)) OR ((glucosidas\*) NEAR/3 (syndrom\* OR diseas\* OR deficien\*)) OR ((diffuse\* OR 2 OR ii) NEAR/3 (glycogenos\*)) OR acid-maltas\* OR GSD-2 OR GSD2 OR GSD-ii OR GSDii):ab,ti) **AND** ((juvenil\* OR late OR later OR adult\* OR ((non) NEAR/3 (infantil\*)):ab,ti) **NOT** ([animals]/lim **NOT** [humans]/lim) **AND** [1999-2019]/py

#### Medline – 697 refs (limited in database to publication year 1999-2019)

(Glycogen Storage Disease Type II/ OR (pompe\* OR ((glycogen\*) ADJ3 (storage\*) ADJ3 (2 OR ii)) OR ((glucosidas\*) ADJ3 (syndrom\* OR diseas\* OR deficien\*)) OR ((diffuse\* OR 2 OR ii) ADJ3 (glycogenos\*)) OR acid-maltas\* OR GSD-2 OR GSD2 OR GSD-ii OR GSDii).ab,ti.) **AND** ((juvenil\* OR late OR later OR adult\* OR ((non) ADJ3 (infantil\*))).ab,ti.) **NOT** (exp animals/ NOT humans/)

#### PsycINFO – 65 refs (limited in database to publication year 1999-2019)

((pompe\* OR ((glycogen\*) ADJ3 (storage\*) ADJ3 (2 OR ii)) OR ((glucosidas\*) ADJ3 (syndrom\* OR diseas\* OR deficien\*)) OR ((diffuse\* OR 2 OR ii) ADJ3 (glycogenos\*)) OR acid-maltas\* OR GSD-2 OR GSD2 OR GSD-ii OR GSDii).ab,ti.) **AND** ((juvenil\* OR late OR later OR adult\* OR ((non) ADJ3 (infantil\*))).ab,ti.)

#### Cochrane (RCTs) – 45 refs (no articles found with a publication year before 1999)

((pompe\* OR ((glycogen\*) NEAR/3 (storage\*) NEAR/3 (2 OR ii)) OR ((glucosidas\*) NEAR/3 (syndrom\* OR diseas\* OR deficien\*)) OR ((diffuse\* OR 2 OR ii) NEAR/3 (glycogenos\*)) OR (acid NEXT/1 maltas\*) OR GSD-2 OR GSD2 OR GSD-ii OR GSDii):ab,ti) **AND** ((juvenil\* OR late OR later OR adult\* OR ((non) NEAR/3 (infantil\*)):ab,ti)

#### Web of Science – 1136 refs (limited in database to publication year 1999-2019)

TS=(((pompe\* OR ((glycogen\*) NEAR/2 (storage\*) NEAR/2 (2 OR ii)) OR ((glucosidas\*) NEAR/2 (syndrom\* OR diseas\* OR deficien\*)) OR ((diffuse\* OR 2 OR ii) NEAR/2 (glycogenos\*)) OR acid-

maltas\* OR GSD-2 OR GSD2 OR GSD-ii OR GSDii)) **AND** ((juvenil\* OR late OR later OR adult\* OR ((non) NEAR/2 (infantil\*))) NOT ((animal\* OR rat OR rats OR mouse OR mice OR murine OR dog OR dogs OR canine OR cat OR cats OR feline OR rabbit OR cow OR cows OR bovine OR rodent\* OR sheep OR ovine OR pig OR swine OR porcine OR veterinar\* OR chick\* OR zebrafish\* OR baboon\* OR nonhuman\* OR primate\* OR cattle\* OR goose OR geese OR duck OR macaque\* OR avian\* OR bird\* OR fish\*) NOT (human\* OR patient\* OR women OR woman OR men OR man)))

**Google Scholar – (random top-200) – 139 refs** (articles with a publication year before 1999 manually deleted in EndNote)

pompe|"glycogen storage 2|ii"|glucosidase syndrome|disease|deficiency|"diffuse|2|ii glycogenose"|acid-maltase juvenile|late|later|adult

### Updated literature search (21-06-2022)

| Database searched                              | Platform         | Years of coverage | Records     | Records after duplicates removed |
|------------------------------------------------|------------------|-------------------|-------------|----------------------------------|
| Embase                                         | Embase.com       | 1971 - Present    | 1945        | 1855                             |
| Medline ALL                                    | Ovid             | 1946 - Present    | 935         | 86                               |
| Web of Science Core Collection*                | Web of Knowledge | 1975 - Present    | 1516        | 461                              |
| Cochrane Central Register of Controlled Trials | Wiley            | 1992 - Present    | 113         | 46                               |
| PsycINFO                                       | Ovid             | 1806 - Present    | 72          | 14                               |
| Additional Search Engines: Google Scholar      |                  |                   | 193         | 36                               |
| <b>Total</b>                                   |                  |                   | <b>4774</b> | <b>2498</b>                      |

*New references in EndNote file: 679*

### **Embase**

('glycogen storage disease type 2'/exp OR (pompe\* OR ((glycogen\*) NEAR/3 (storage\*) NEAR/3 (2 OR ii)) OR ((glucosidas\*) NEAR/3 (syndrom\* OR diseas\* OR deficien\*)) OR ((diffuse\* OR 2 OR ii) NEAR/3 (glycogenos\*)) OR acid-maltas\* OR GSD-2 OR GSD2 OR GSD-ii OR GSDii):ab,ti,kw) **AND** ((juvenil\* OR late OR later OR adult\* OR ((non) NEAR/3 (infantil\*)))ab,ti,kw) **NOT** ([animals]/lim NOT [humans]/lim) **AND** [1999-2022]/py

### **Medline – (limited in database to publication year 1999-2022)**

(Glycogen Storage Disease Type II/ OR (pompe\* OR ((glycogen\*) ADJ3 (storage\*) ADJ3 (2 OR ii)) OR ((glucosidas\*) ADJ3 (syndrom\* OR diseas\* OR deficien\*)) OR ((diffuse\* OR 2 OR ii) ADJ3

(glycogenos\*) OR acid-maltas\* OR GSD-2 OR GSD2 OR GSD-ii OR GSDii).ab,ti,kf.) **AND** ((juvenil\* OR late OR later OR adult\* OR ((non) ADJ3 (infantil\*))).ab,ti,kf.) **NOT** (exp animals/ NOT humans/)

**PsycINFO** – (limited in database to publication year 1999-2022)

((pompe\* OR ((glycogen\*) ADJ3 (storage\*) ADJ3 (2 OR ii)) OR ((glucosidas\*) ADJ3 (syndrom\* OR diseases\* OR deficient\*))) OR ((diffuse\* OR 2 OR ii) ADJ3 (glycogenos\*)) OR acid-maltas\* OR GSD-2 OR GSD2 OR GSD-ii OR GSDii).ab,ti.) **AND** ((juvenil\* OR late OR later OR adult\* OR ((non) ADJ3 (infantil\*))).ab,ti.)

**Cochrane (RCTs)** (articles with a publication year before 1999 manually deleted in EndNote)

((pompe\* OR ((glycogen\*) NEAR/3 (storage\*) NEAR/3 (2 OR ii)) OR ((glucosidas\*) NEAR/3 (syndrom\* OR diseases\* OR deficient\*))) OR ((diffuse\* OR 2 OR ii) NEAR/3 (glycogenos\*)) OR (acid NEXT/1 maltas\*) OR GSD-2 OR GSD2 OR GSD-ii OR GSDii):ab,ti,kw) **AND** ((juvenil\* OR late OR later OR adult\* OR ((non) NEAR/3 (infantil\*))).ab,ti,kw)

**Web of Science**

TS=(((pompe\* OR ((glycogen\*) NEAR/2 (storage\*) NEAR/2 (2 OR ii)) OR ((glucosidas\*) NEAR/2 (syndrom\* OR diseases\* OR deficient\*))) OR ((diffuse\* OR 2 OR ii) NEAR/2 (glycogenos\*)) OR acid-maltas\* OR GSD-2 OR GSD2 OR GSD-ii OR GSDii) **AND** ((juvenil\* OR late OR later OR adult\* OR ((non) NEAR/2 (infantil\*)))) NOT ((animal\* OR rat OR rats OR mouse OR mice OR murine OR dog OR dogs OR canine OR cat OR cats OR feline OR rabbit OR cow OR cows OR bovine OR rodent\* OR sheep OR ovine OR pig OR swine OR porcine OR veterinar\* OR chick\* OR zebrafish\* OR baboon\* OR nonhuman\* OR primate\* OR cattle\* OR goose OR geese OR duck OR macaque\* OR avian\* OR bird\* OR fish\*) NOT (human\* OR patient\* OR women OR woman OR men OR man))) AND PY=(1999-2022)

**Google Scholar** – (top-200 relevance rank) – 193 refs (articles with a publication year before 1999 manually deleted in EndNote)

pompe|"glycogen storage 2|ii"|glucosidase syndrome|disease|deficiency|"diffuse|2|ii glycogenose"|acid-maltase juvenile|late|later|adult
